# Supplementary material
Source: Springer Nature journal article supplement (https://www.springermedizin.de/resource/supplementary/12885_2014_5181_MOESM4_ESM.pdf/9468600)

**A**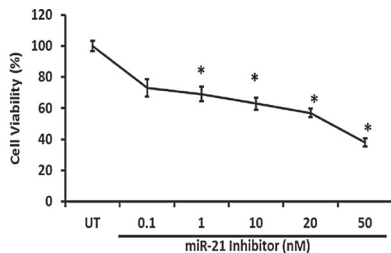**B**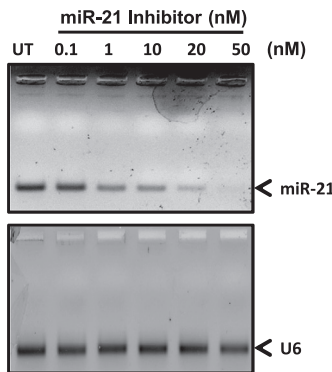**C**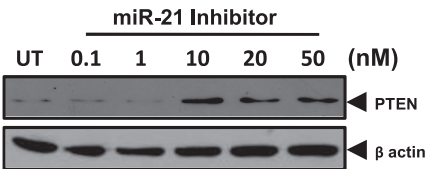**D**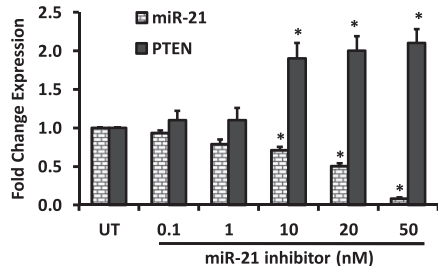**E**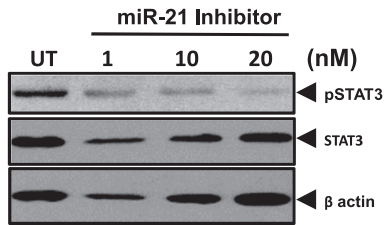

Supplement: MOESM4 [file 9468600]
